# Supplementary material
Source: PubMed Central journal article supplement (PMC4739814)
Supplement: NIHMS743664-supplement.pdf [file NIHMS743664-supplement.pdf]

**eTable 1.** Physician specialty classification

| Specialty classification           | Open Payments allopathic and osteopathic physician specialty classification <sup>1</sup> | AMA specialty classification <sup>a</sup> |
|------------------------------------|------------------------------------------------------------------------------------------|-------------------------------------------|
| <i>Medical specialties</i>         |                                                                                          |                                           |
| Allergy & immunology               | Allergy & Immunology                                                                     | Allergy/Immunology                        |
|                                    | Allergy & Immunology/ Allergy                                                            |                                           |
|                                    | Allergy & Immunology/ Clinical & Laboratory Immunology                                   |                                           |
| Cardiovascular disease             | Internal Medicine/ Cardiovascular Disease                                                | Cardiovascular Disease                    |
|                                    | Internal Medicine/ Clinical Cardiac Electrophysiology                                    |                                           |
|                                    | Internal Medicine/ Interventional Cardiology                                             |                                           |
| Dermatology                        | Dermatology                                                                              | Dermatology                               |
|                                    | Dermatology/ Clinical & Laboratory Dermatological Immunology                             |                                           |
|                                    | Dermatology/ Dermatopathology                                                            |                                           |
|                                    | Dermatology/ MOHS-Micrographic Surgery                                                   |                                           |
|                                    | Dermatology/ Pediatric Dermatology                                                       |                                           |
|                                    | Dermatology/ Procedural Dermatology                                                      |                                           |
| Family medicine & general practice | Family Medicine                                                                          | Family Medicine/<br>General Practice      |
|                                    | Family Medicine/ Addiction Medicine                                                      |                                           |
|                                    | Family Medicine/ Adolescent Medicine                                                     |                                           |

Family Medicine/ Adult Medicine

Family Medicine/ Bariatric Medicine

Family Medicine/ Geriatric Medicine

Family Medicine/ Hospice and Palliative Medicine

Family Medicine/ Sleep Medicine

Family Medicine/ Sports Medicine

General Practice

Gastroenterology Internal Medicine/ Gastroenterology

Internal medicine Hospitalist

Internal Medicine

Internal Medicine/ Addiction Medicine

Internal Medicine/ Adolescent Medicine

Internal Medicine/ Allergy & Immunology

Internal Medicine/ Bariatric Medicine

Internal Medicine/ Clinical & Laboratory Immunology

Internal Medicine/ Critical Care Medicine

Internal Medicine/ Endocrinology, Diabetes & Metabolism

Internal Medicine/ Geriatric Medicine

Internal Medicine/ Hematology

Gastroenterology

Internal Medicine

Pulmonary Diseases

Internal Medicine/ Hematology & Oncology  
Internal Medicine/ Hepatology  
Internal Medicine/ Hospice and Palliative Medicine  
Internal Medicine/ Hypertension Specialist  
Internal Medicine/ Infectious Disease  
Internal Medicine/ Magnetic Resonance Imaging (MRI)  
Internal Medicine/ Medical Oncology  
Internal Medicine/ Nephrology  
Internal Medicine/ Rheumatology  
Internal Medicine/ Pulmonary Disease  
Internal Medicine/ Sleep Medicine  
Internal Medicine/ Sports Medicine  
Internal Medicine/ Transplant Hepatology

Pediatrics Pediatrics

Pediatrics

Pediatrics/ Adolescent Medicine  
Pediatrics/ Child Abuse Pediatrics  
Pediatrics/ Clinical & Laboratory Immunology  
Pediatrics/ Developmental & Behavioral Pediatrics  
Pediatrics/ Hospice and Palliative Medicine

Pediatrics/ Medical Toxicology

Pediatrics/ Neonatal-Perinatal Medicine

Pediatrics/ Neurodevelopmental Disabilities

Pediatrics/ Pediatric Allergy/Immunology

Pediatrics/ Pediatric Critical Care Medicine

Pediatrics/ Pediatric Emergency Medicine

Pediatrics/ Pediatric Endocrinology

Pediatrics/ Pediatric Gastroenterology

Pediatrics/ Pediatric Hematology-Oncology

Pediatrics/ Pediatric Infectious Diseases

Pediatrics/ Pediatric Nephrology

Pediatrics/ Pediatric Pulmonology

Pediatrics/ Pediatric Rheumatology

Pediatrics/ Pediatric Transplant Hepatology

Pediatrics/ Sleep Medicine

Pediatrics/ Sports Medicine

Pediatric cardiology    Pediatrics/ Pediatric Cardiology

Pediatric Cardiology

*Surgical Specialties*

Colorectal surgery    Colon & Rectal Surgery

Colon/Rectal Surgery

|                              |                                                                            |                               |
|------------------------------|----------------------------------------------------------------------------|-------------------------------|
| Neurosurgery                 | Neurological Surgery                                                       | Neurological Surgery          |
| Obstetrics & gynecology      | Obstetrics & Gynecology                                                    | Obstetrics/Gynecology         |
|                              | Obstetrics & Gynecology/ Bariatric Medicine                                |                               |
|                              | Obstetrics & Gynecology/ Critical Care Medicine                            |                               |
|                              | Obstetrics & Gynecology/ Female Pelvic Medicine and Reconstructive Surgery |                               |
|                              | Obstetrics & Gynecology/ Gynecologic Oncology                              |                               |
|                              | Obstetrics & Gynecology/ Gynecology                                        |                               |
|                              | Obstetrics & Gynecology/ Hospice and Palliative Medicine                   |                               |
|                              | Obstetrics & Gynecology/ Maternal & Fetal Medicine                         |                               |
|                              | Obstetrics & Gynecology/ Obstetrics                                        |                               |
|                              | Obstetrics & Gynecology/ Reproductive Endocrinology                        |                               |
| Ophthalmology                | Ophthalmology                                                              | Ophthalmology                 |
| Oral & maxillofacial surgery | Oral & Maxillofacial Surgery                                               | Oral/Maxillofacial<br>Surgery |
| Orthopedic surgery           | Orthopaedic Surgery                                                        | Orthopedic Surgery            |
|                              | Orthopaedic Surgery/ Adult Reconstructive Orthopaedic Surgery              |                               |
|                              | Orthopaedic Surgery/ Foot and Ankle Surgery                                |                               |
|                              | Orthopaedic Surgery/ Hand Surgery                                          |                               |
|                              | Orthopaedic Surgery/ Orthopaedic Surgery of the Spine                      |                               |

Orthopaedic Surgery/ Orthopaedic Trauma

Orthopaedic Surgery/ Pediatric Orthopaedic Surgery

Orthopaedic Surgery/ Sports Medicine

Otolaryngology Otolaryngology

Otolaryngology

Otolaryngology/ Facial Plastic Surgery

Otolaryngology/ Otolaryngic Allergy

Otolaryngology/ Otolaryngology/ Facial Plastic Surgery

Otolaryngology/ Otolaryngology & Neurotology

Otolaryngology/ Pediatric Otolaryngology

Otolaryngology/ Plastic Surgery within the Head & Neck

Otolaryngology/ Sleep Medicine

Plastic surgery Plastic Surgery

Plastic Surgery

Plastic Surgery/ Plastic Surgery Within the Head and Neck

Plastic Surgery/ Surgery of the Hand

Surgery (General) Surgery

General Surgery

Surgery/ Hospice and Palliative Medicine

Surgery/ Pediatric Surgery

Surgery/ Plastic and Reconstructive Surgery

Surgery/ Surgery of the Hand

Surgery/ Surgical Critical Care

Surgery/ Surgical Oncology

Surgery/ Trauma Surgery

Surgery/ Vascular Surgery

Transplant Surgery

Thoracic surgery Thoracic Surgery (Cardiothoracic Vascular Surgery)

Thoracic Surgery

Urology Urology

Urologic Surgery

Urology/ Female Pelvic Medicine and Reconstructive Surgery

Urology/ Pediatric Urology

*Other Specialties*

Anesthesiology Anesthesiology

Anesthesiology

Anesthesiology/ Addiction Medicine

Anesthesiology/ Critical Care Medicine

Anesthesiology/ Hospice and Palliative Medicine

Anesthesiology/ Pain Medicine

Anesthesiology/ Pediatric Anesthesiology

Emergency medicine Emergency Medicine

Emergency Medicine

Emergency Medicine/ Emergency Medical Services

Emergency Medicine/ Hospice and Palliative Medicine

Emergency Medicine/ Medical Toxicology

Emergency Medicine/ Pediatric Emergency Medicine

Emergency Medicine/ Sports Medicine

Emergency Medicine/ Undersea and Hyperbaric Medicine

Pathology Pathology/ Anatomic Pathology

Pathology --

Pathology/ Anatomic Pathology & Clinical Pathology

Anatomic & Clinical

Pathology/ Blood Banking & Transfusion Medicine

Pathology/ Chemical Pathology

Pathology/ Clinical Pathology

Pathology/ Clinical Pathology/ Laboratory Medicine

Pathology/ Cytopathology

Pathology/ Dermatopathology

Pathology/ Forensic Pathology

Pathology/ Hematology

Pathology/ Immunopathology

Pathology/ Medical Microbiology

Pathology/ Molecular Genetic Pathology

Pathology/ Neuropathology

Pathology/ Pediatric Pathology



|            |                                                                                  |                  |
|------------|----------------------------------------------------------------------------------|------------------|
| Psychiatry | Psychiatry & Neurology/ Addiction Medicine                                       | Psychiatry       |
|            | Psychiatry & Neurology/ Addiction Psychiatry                                     | Child Psychiatry |
|            | Psychiatry & Neurology/ Child & Adolescent Psychiatry                            |                  |
|            | Psychiatry & Neurology/ Forensic Psychiatry                                      |                  |
|            | Psychiatry & Neurology/ Geriatric Psychiatry                                     |                  |
|            | Psychiatry & Neurology/ Psychiatry                                               |                  |
| Neurology  | Psychiatry & Neurology/ Neurology                                                | Neurology        |
|            | Psychiatry & Neurology/ Neurology with Special Qualifications in Child Neurology |                  |
|            | Psychiatry & Neurology/ Behavioral Neurology & Neuropsychiatry                   |                  |
|            | Psychiatry & Neurology/ Clinical Neurophysiology                                 |                  |
|            | Psychiatry & Neurology/ Diagnostic Neuroimaging                                  |                  |
|            | Psychiatry & Neurology/ Hospice and Palliative Medicine                          |                  |
|            | Psychiatry & Neurology/ Neurodevelopmental Disabilities                          |                  |
|            | Psychiatry & Neurology/ Neuromuscular Medicine                                   |                  |
|            | Psychiatry & Neurology/ Pain Medicine                                            |                  |
|            | Psychiatry & Neurology/ Psychosomatic Medicine                                   |                  |
|            | Psychiatry & Neurology/ Sleep Medicine                                           |                  |
|            | Psychiatry & Neurology/ Sports Medicine                                          |                  |
|            | Psychiatry & Neurology/ Vascular Neurology                                       |                  |

|           |                                                |                         |
|-----------|------------------------------------------------|-------------------------|
| Radiology | Radiology/ Body Imaging                        | Radiology               |
|           | Radiology/ Diagnostic Neuroimaging             | Diagnostic Radiology    |
|           | Radiology/ Diagnostic Radiology                | Radiation Oncology      |
|           | Radiology/ Diagnostic Ultrasound               |                         |
|           | Radiology/ Neuroradiology                      |                         |
|           | Radiology/ Nuclear Radiology                   |                         |
|           | Radiology/ Pediatric Radiology                 |                         |
|           | Radiology/ Radiation Oncology                  |                         |
|           | Radiology/ Radiological Physics                |                         |
|           | Radiology/ Therapeutic Radiology               |                         |
|           | Radiology/ Vascular & Interventional Radiology |                         |
| Other     | Phlebology                                     | Other                   |
|           | Pain Medicine/ Interventional Pain Medicine    | Nuclear Medicine        |
|           | Pain Medicine/ Pain Medicine                   | General Preventive      |
|           | Neuromusculoskeletal Medicine & OMM            | Medicine                |
|           | Neuromusculoskeletal Medicine, Sports Medicine | Medical Genetics        |
|           | Legal Medicine                                 | Physical Medicine &     |
|           | Independent Medical Examiner                   | Rehabilitation          |
|           | Electrodiagnostic Medicine                     | Public Health & General |

---

Clinical Pharmacology

Nuclear Medicine

Nuclear Medicine/ In Vivo & In Vitro Nuclear Medicine

Nuclear Medicine/ Nuclear Cardiology

Nuclear Medicine/ Nuclear Imaging & Therapy

Preventive Medicine/ Aerospace Medicine

Preventive Medicine/ Medical Toxicology

Preventive Medicine/ Occupational Medicine

Preventive Medicine/ Preventive Medicine/ Occupational Environmental Medicine

Preventive Medicine/ Public Health & General Preventive Medicine

Preventive Medicine/ Sports Medicine

Preventive Medicine/ Undersea and Hyperbaric Medicine

Medical Genetics/ Clinical Biochemical Genetics

Medical Genetics/ Clinical Cytogenetic

Medical Genetics/ Clinical Genetics (M.D.)

Medical Genetics/ Clinical Molecular Genetics

Medical Genetics/ Molecular Genetic Pathology

Medical Genetics/ Ph.D. Medical Genetics

Physical Medicine & Rehabilitation

Preventive Medicine

Occupational Medicine

Aerospace Medicine

Physical Medicine & Rehabilitation/ Hospice and Palliative Medicine

Physical Medicine & Rehabilitation/ Neuromuscular Medicine

Physical Medicine & Rehabilitation/ Pain Medicine

Physical Medicine & Rehabilitation/ Pediatric Rehabilitation Medicine

Physical Medicine & Rehabilitation/ Spinal Cord Injury Medicine

Physical Medicine & Rehabilitation/ Sports Medicine

---

<sup>a</sup>Physician specialty taxonomy per AMA masterfile data (American Medical Association<sup>17</sup>, 2014) used to calculate the number of active physicians for each specialty.

**eTable 2.** Description of nature of payment types<sup>a</sup>

| <b>Nature of payment</b>                                                                                                                            | <b>Definition</b>                                                                                                                                            | <b>Example</b>                                                                                                    |
|-----------------------------------------------------------------------------------------------------------------------------------------------------|--------------------------------------------------------------------------------------------------------------------------------------------------------------|-------------------------------------------------------------------------------------------------------------------|
| Charitable contribution                                                                                                                             | Any payment or transfer of value made to a tax-exempt organization, but only if it is not more specifically described by one of the other payment categories | Donation to hospital to set up an educational program                                                             |
| Compensation for services other than consulting, including serving as faculty or as a speaker at an event other than a continuing education program | "Payments to physicians for speaking, training, and education engagements that are not for continuing education"                                             | Drug talk with other physicians                                                                                   |
| Compensation for serving as faculty or as a speaker for an accredited or certified continuing education program                                     | Compensation for serving as faculty or as a speaker for an accredited or certified continuing education program                                              | Physician lecturer at continuing education program sponsored by a drug company, at a professional society meeting |
| Compensation for serving as faculty or speaker for an unaccredited and non-certified continuing education program                                   | Compensation for serving as faculty or as a speaker for an unaccredited and non-certified continuing education program                                       | Physician speaker at annual training course on diabetes treatments                                                |
| Consulting fee                                                                                                                                      | "Payments to physicians for advice and expertise                                                                                                             | A physician paid for his/her time                                                                                 |

---

|                                                         |                                                                                                                    |                                                                     |
|---------------------------------------------------------|--------------------------------------------------------------------------------------------------------------------|---------------------------------------------------------------------|
|                                                         | on a particular medical product or treatment"                                                                      | testing a new medical tool                                          |
| Current or prospective ownership or investment interest | Ownership/investment interests currently held by physicians including those that physicians have not yet exercised | Physician owns investment shares in a drug company                  |
| Education                                               | "Payments or transfers of value for classes or educational programs"                                               | Textbooks                                                           |
| Entertainment                                           | "Attendance at recreational, cultural, sporting or other events that would generally have a cost"                  | Tickets to a basketball game                                        |
| Food and beverage                                       | Food and beverage                                                                                                  | Dinner with a sales representative                                  |
| Gift                                                    | "Anything provided to a physician/teaching hospital that does not fit into another category"                       | A flashdrive with company name on it                                |
| Grant                                                   | Payments to a physician or teaching hospital in support of a specific cause or activity                            | Grant for physician training in robotic surgery                     |
| Honoraria                                               | "Similar to consulting fees, but generally reserved for a one-time, short duration activity"                       | One time payment for device presentation                            |
| Royalty or license                                      | Royalty or other payment based on sales of products that use a physician's intellectual property                   | Percentage of device sales for physician who invented a new product |

---

---

Travel and lodging

Travel and lodging

Hotel room at meeting

---

<sup>a</sup>Adapted from "Natures of Payment" chart from Centers for Medicare & Medicaid Services (CMS):  
<https://www.cms.gov/OpenPayments/About/Natures-of-Payment.html> (accessed June 15, 2015).

**eTable 3.** Nature<sup>b</sup> of identified general payments by specialty type, August 1, 2013 to December 31, 2013

| Nature of general payments or transfers of value                                                           | <i>Medical specialties</i>                            |                                      | <i>Surgical specialties</i>                           |                                      | <i>Other specialties</i>                              |                                      |
|------------------------------------------------------------------------------------------------------------|-------------------------------------------------------|--------------------------------------|-------------------------------------------------------|--------------------------------------|-------------------------------------------------------|--------------------------------------|
|                                                                                                            | <i>General Payments<sup>c</sup>, No. (% of total)</i> | <i>Total value, USD (% of total)</i> | <i>General Payments<sup>c</sup>, No. (% of total)</i> | <i>Total value, USD (% of total)</i> | <i>General Payments<sup>c</sup>, No. (% of total)</i> | <i>Total value, USD (% of total)</i> |
| Charitable contribution                                                                                    | 133 (<1%)                                             | \$85,096 (<1%)                       | 14 (<1%)                                              | \$24,313 (<1%)                       | 27 (<1%)                                              | \$4,341 (<1%)                        |
| Compensation for services other than consulting, including serving as faculty/speaker at a non-CME program | 42,917 (3%)                                           | \$65,062,746 (37%)                   | 14,192 (3%)                                           | \$20,301,167 (11%)                   | 11,803 (3%)                                           | \$18,117,813 (28%)                   |
| Compensation for serving as faculty/speaker for a non-accredited and non-certified CME program             | 2,519 (<1%)                                           | \$4,492,543 (3%)                     | 888 (<1%)                                             | \$3,004,673 (2%)                     | 590 (<1%)                                             | \$1,149,211 (2%)                     |
| Compensation for serving as faculty/speaker for an accredited                                              | 69 (<1%)                                              | \$102,920 (<1%)                      | 40 (<1%)                                              | \$58,833 (<1%)                       | 32 (<1%)                                              | \$59,166 (<1%)                       |



or certified CME program

|                                                         |                  |                      |                |                      |                |                     |
|---------------------------------------------------------|------------------|----------------------|----------------|----------------------|----------------|---------------------|
| Consulting fee                                          | 21,915 (1%)      | \$36,769,655 (21%)   | 9,678 (2%)     | \$30,141,829 (16%)   | 10,937 (3%)    | \$18,688,637 (29%)  |
| Current or prospective ownership or investment interest | 3 (<1%)          | \$323,208 (<1%)      | 1,400 (<1%)    | \$6,615,424 (4%)     | 16 (<1%)       | \$184,112 (<1%)     |
| Education                                               | 79,320 (5%)      | \$2,840,845 (2%)     | 15,431 (4%)    | \$6,697,189 (4%)     | 19,932 (6%)    | \$1,163,369 (2%)    |
| Entertainment                                           | 320 (<1%)        | \$26,723 (<1%)       | 396 (<1%)      | \$26,750 (<1%)       | 253 (<1%)      | \$15,472 (<1%)      |
| Food and beverage                                       | 1,423,222 (87%)  | \$32,544,415 (18%)   | 335,249 (79%)  | \$12,225,759 (6%)    | 278,139 (79%)  | \$7,825,896 (12%)   |
| Gift                                                    | 2,663 (<1%)      | \$369,578 (<1%)      | 2,624 (1%)     | \$501,825 (<1%)      | 554 (<1%)      | \$99,881 (<1%)      |
| Grant                                                   | 78 (<1%)         | \$470,346 (<1%)      | 194 (<1%)      | \$1,433,559 (1%)     | 48 (<1%)       | \$196,188 (<1%)     |
| Honoraria                                               | 5,050 (<1%)      | \$6,284,565 (4%)     | 1,663 (<1%)    | \$3,681,371 (2%)     | 3,737 (1%)     | \$6,174,705 (9%)    |
| Royalty or license                                      | 119 (<1%)        | \$7,180,533 (4%)     | 2,431 (<1%)    | \$89,011,306 (47%)   | 119 (<1%)      | \$3,345,633 (5%)    |
| Travel and lodging                                      | 58,437 (4%)      | \$19,460,747 (11%)   | 42,267 (10%)   | \$15,090,435 (8%)    | 26,000 (7%)    | \$8,037,017 (12%)   |
| <b>Total</b>                                            | <b>1,636,765</b> | <b>\$176,013,917</b> | <b>426,497</b> | <b>\$188,814,432</b> | <b>352,187</b> | <b>\$65,061,441</b> |

<sup>a</sup>Abbreviations: CME=Continuing Medical Education, No.= Number, USD=2013 United States Dollars

<sup>b</sup>Nature of payment is the reason general payment was made.

<sup>c</sup>The proportion of general payments in each nature of payment category differed significantly between specialty types (Pearson's chi-square test,  $P < .001$ ).
